# Supplementary material for: Sex bias in CNS autoimmune disease mediated by androgen control of autoimmune regulator
Source: PubMed Central journal article supplement (PMC5512610; doi:10.1038/ncomms11350), 2016-04-13
Supplement: ncomms11350-s1.pdf [file ncomms11350-s1.pdf]

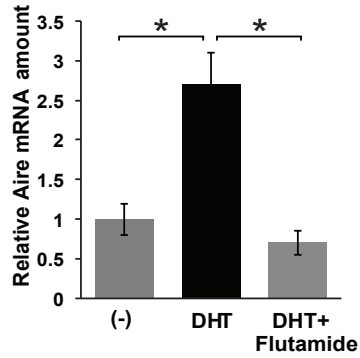

**Supplementary Figure 1: Flutamide blocks DHT mediated increase in Aire expression.**

Relative Aire mRNA expression in primary mouse thymic stromal cells after culture with or without 10nM DHT or vehicle control (-) for 6 h. Cells were pretreated with or without 5 uM flutamide for 2 hours prior to DHT incubation. 10% charcoal-stripped serum was used in culture medium. Relative mRNA expression was measured by quantitative RT-PCR. \*p<0.05.

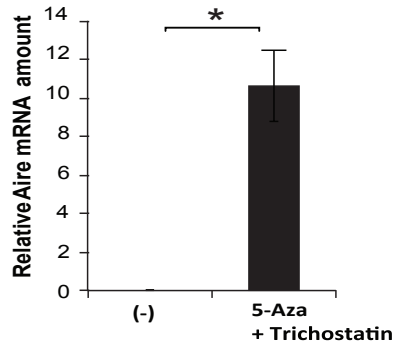

**Supplementary Figure 2: 5 Aza and Trichostatin induce Aire transcription in LnCaP cells.**

Relative Aire mRNA expression in LNCaP cells treated for 24 hours with 5 mM 5-Aza, a DNA methyltransferase inhibitor, and 100 ng/mL trichostatin, a deacetylase inhibitor. Relative expression was measured by quantitative RT-PCR. \*p<0.05.

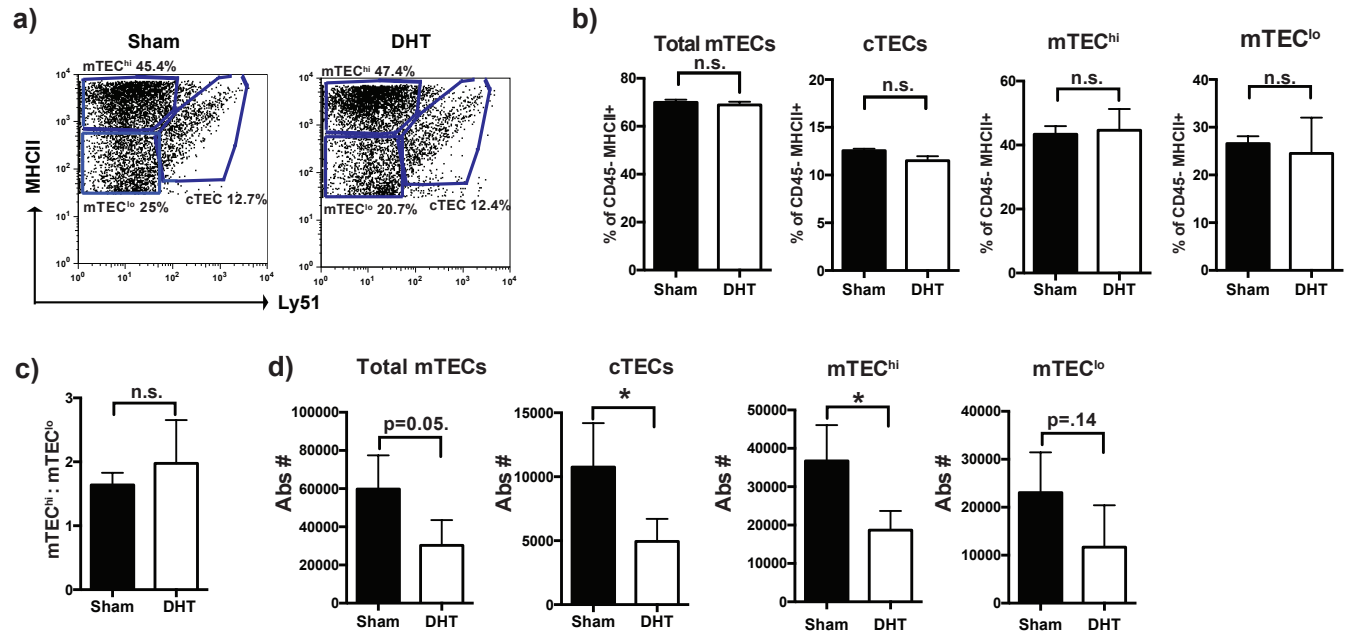

**Supplementary Figure 3: DHT does not alter thymic epithelial subset frequencies, but decreases thymic epithelial numbers globally** (a) Representative flow cytometric plots of MHCII and Ly51 expression in MHCII<sup>+</sup> CD45<sup>-</sup> thymic stromal cells of male mice subjected to sham treatment or DHT pellet insertion. Gating for mTEC<sup>hi</sup>, mTEC<sup>lo</sup>, and cTECs and corresponding frequencies are shown. (b) Average frequencies of total mTEC (mTEC<sup>hi</sup> + mTEC<sup>lo</sup>), cTEC, mTEC<sup>hi</sup> cells, and mTEC<sup>lo</sup> cells. (c) Average ratio of mTEC<sup>hi</sup> : mTEC<sup>lo</sup> cells. (d) Average absolute numbers of subsets in (b). n= 3-4 per group. n.s.= not significant. \*p<0.05.

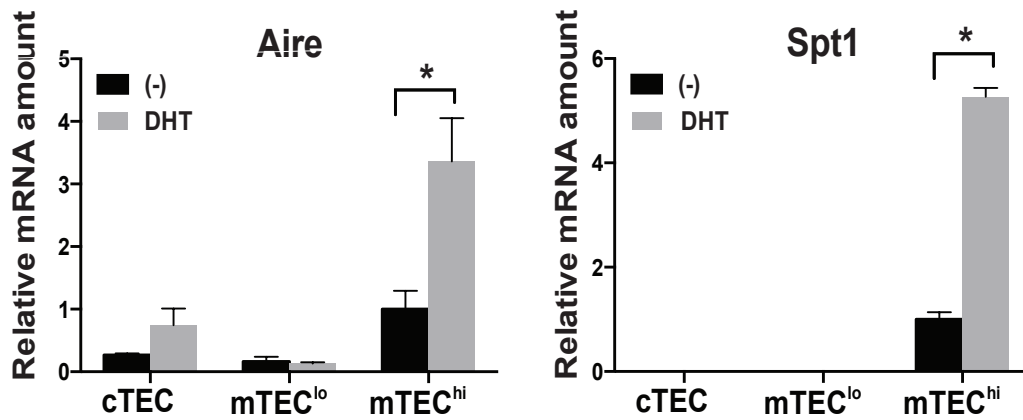

**Supplementary Figure 4: DHT increases Aire and TSA expression in MHCII-high mTECs.** (A and B) Relative Aire (A) and Spt1 (B) expression in sorted MHCII-high mTECs (mTEC<sup>hi</sup>; CD45<sup>-</sup> Ly51<sup>low</sup>, MHCII<sup>high</sup>), MHCII-low mTECs (mTEC<sup>lo</sup>; CD45<sup>-</sup> Ly51<sup>low</sup>, MHCII<sup>low</sup>), or cTEC (CD45<sup>-</sup> Ly51<sup>high</sup>, MHCII<sup>+</sup>) cells by quantitative RT-PCR. Thymi are from mice treated with placebo (black bars) or 10 mg DHT pellet (gray bars). \*p<0.05.

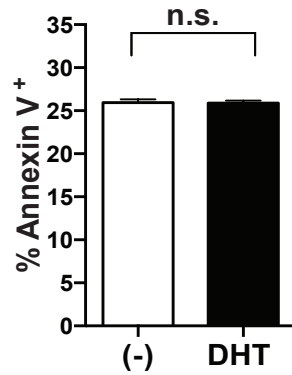

**Supplementary Figure 5: DHT is not directly toxic to thymocytes.** Thymocytes from *Typr1<sup>B-w</sup>* TRP-1 TCR Tg Rag <sup>-/-</sup> mice, which are rescued from negative selection due to TRP-1 deficiency, were incubated with vehicle control (-) or 10nM DHT for six hours. The frequency of Annexin V<sup>+</sup> thymocytes was determined by flow cytometry.

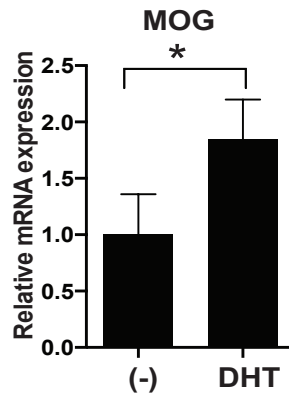

**Supplementary Figure 6: DHT induces MOG expression in thymic stroma.** Thymic stroma isolated from WT male C57BL/6 mice were incubated with either vehicle control (-) or 10nM DHT. Relative MOG mRNA expression was compared by real time RT-PCR.

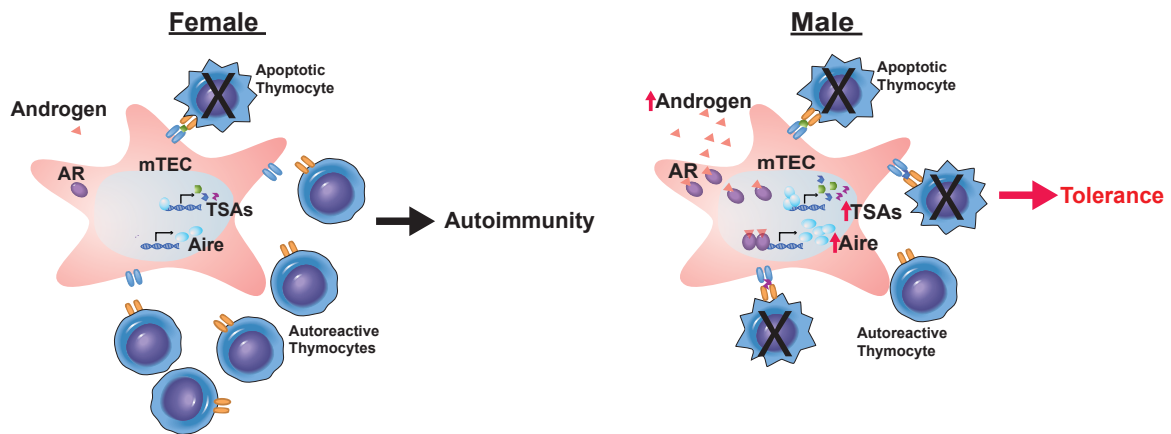

**Supplementary Figure 7: Model for male protection from autoimmunity.** A proposed model in which higher circulating androgen levels in males induce higher Aire and TSA expression in the thymus. More robust negative selection of self-reactive T cells protects males from autoimmune diseases.

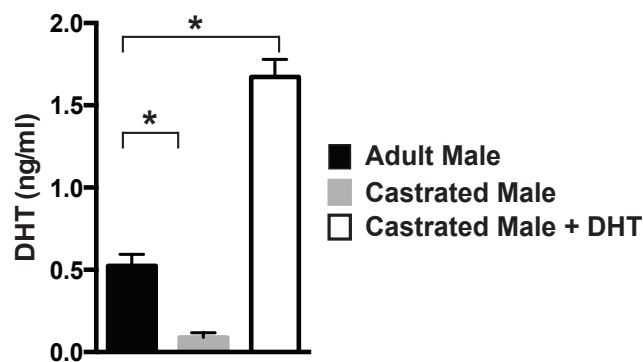

**Supplementary Figure 8: Serum DHT levels.** Circulating levels of DHT in unmanipulated adult mice, castrated male mice, and castrated male mice implanted with DHT pellet. \* $p < 0.05$ .

| Aire promoter | Mutations in Androgen Receptor Binding Sites |                   |                  |                  |                  |                  |                  |                  |           |
|---------------|----------------------------------------------|-------------------|------------------|------------------|------------------|------------------|------------------|------------------|-----------|
|               | -1032                                        | -994              | -970             | -943             | -391             | -339             | -260             | -236             | -52       |
| WT            | GCACTGTCC                                    | CTCCTGTCC         | GGACACCTT        | CTCCTGTCC        | GGACAGGGC        | TCTCTGTCC        | GGACAGCAG        | GAAGTGTCC        | CCAGTGTCC |
| Mut1          | GCACTGTCC                                    | CTCCTGTCC         | GGACACCTT        | CTCCTGTCC        | <b>CGACAAGGA</b> | <b>TCTCAAAAC</b> | <b>CGCGAACAG</b> | <b>GAAGACCAA</b> | CCAGTGTCC |
| Mut2          | <b>GCAAAAAC</b>                              | CTCCT <b>AAAC</b> | <b>CGCAACCTT</b> | <b>CTCCAAAAC</b> | GGACAGGGC        | TCTCTGTCC        | GGACAGCAG        | GAAGTGTCC        | CCAGTGTCC |
| Mut3          | <b>GCAAAAAC</b>                              | CTCCT <b>AAAC</b> | <b>CGCAACCTT</b> | <b>CTCCAAAAC</b> | <b>CGACAAGGA</b> | <b>TCTCAAAAC</b> | <b>CGCGAACAG</b> | <b>GAAGACCAA</b> | CCAGTGTCC |
| Del           | -----                                        | -----             | -----            | -----            | -----            | -----            | -----            | -----            | -----     |

**Supplementary Table 1: Sequences of wildtype and mutated AIRE 5' promoter regions in AIRE promoter-luciferase reporter constructs.** Sequences at 9 potential AR binding sites (-1032, -994, -970, -943, -391, -339, -260, -236, and -52 relative to translational start site) in the AIRE 5' promoter region. Wildtype (WT) sequences for AR binding sites are shown at the top. For Mut1-3 constructs, multiple point mutations in the potential AR binding sites are shown in bold. The Del construct contains deletions (-) of all 9 AR binding sites.

|                                   | <b>WT+Sham<br/>n=19</b> | <b>WT+DHT<br/>n=15</b>        | <b>GW+Sham<br/>n=15</b> | <b>GW+DHT<br/>n=16</b> |
|-----------------------------------|-------------------------|-------------------------------|-------------------------|------------------------|
| <b>Mean peak disease severity</b> | <b>3.2</b>              | <b>2.4</b>                    | <b>3.7</b>              | <b>3.7</b>             |
| <i>Experiment 1</i>               | 3.0(0.25)<br>n=8        | 2.2(0.38) <sup>a</sup><br>n=5 | 3.5(0.19)<br>n=5        | 3.4(0.19)<br>n=5       |
| <i>Experiment 2</i>               | 3.6(0.2)<br>n=5         | 2.6(0.5) <sup>a</sup><br>n=5  | 3.8(0.2)<br>n=5         | 4(0)<br>n=5            |
| <i>Experiment 3</i>               | 3.8(0.4)<br>n=6         | 3(0.8) <sup>a</sup><br>n=5    | 3.8(0.4)<br>n=5         | 3.3(1.0)<br>n=6        |
| <b>Mean day of onset</b>          | <b>8.8</b>              | <b>10.8</b>                   | <b>8.6</b>              | <b>9.4</b>             |
| <i>Experiment 1</i>               | 9.6(0.3)                | 12.5(1.5) <sup>a</sup>        | 9.0(0.32)               | 9.2(0.2)               |
| <i>Experiment 2</i>               | 8.4(0.2)                | 8.8(0.4) <sup>a</sup>         | 8.0(0)                  | 8.6(0.3)               |
| <i>Experiment 3</i>               | 8.5(0.5)                | 11(2.2) <sup>a</sup>          | 8.8(0.4)                | 10.6(1.3)              |
| <b>Cumulative score*</b>          | <b>37.5</b>             | <b>20.4</b>                   | <b>43.9</b>             | <b>41.9</b>            |
| <i>Experiment 1</i>               | 32.6(5.7)               | 15.8(5.3) <sup>a</sup>        | 42.0(4.0)               | 39.0(3.0)              |
| <i>Experiment 2</i>               | 40.4(2.7)               | 25(4.0) <sup>a</sup>          | 45.8(1.4)               | 44.8(2.4)              |
| <i>Experiment 3</i>               | n/a                     | n/a                           | n/a                     | n/a                    |
| <b>Death from disease</b>         | <b>1/19</b>             | <b>0/15</b>                   | <b>1/15</b>             | <b>2/10</b>            |
| <i>Experiment 1</i>               | 0/8                     | 0/5                           | 0/5                     | 0/5                    |
| <i>Experiment 2</i>               | 1/5                     | 0/5                           | 1/5                     | 2/5                    |
| <i>Experiment 3</i>               | 0/6                     | 0/5                           | 0/5                     | 0/6                    |
| <b>Incidence</b>                  | <b>19/19</b>            | <b>14/15</b>                  | <b>15/15</b>            | <b>16/16</b>           |
| <i>Experiment 1</i>               | 8/8                     | 4/5                           | 5/5                     | 5/5                    |
| <i>Experiment 2</i>               | 5/5                     | 5/5                           | 5/5                     | 5/5                    |
| <i>Experiment 3</i>               | 6/6                     | 5/5                           | 5/5                     | 6/6                    |

**Supplementary Table 2: MOG-induced EAE in male mice treated with DHT.** Clinical EAE scores in DHT or sham treated WT or Aire-deficient Aire<sup>GW/+</sup> male mice. Values in bold are means or sums for three experiments. For each experiment, values are means (SE). <sup>a</sup>Significant difference from genotype-matched sham treated counterpart. \*Sum of scores from Day 0 to 21. Cumulative scores are not available (n/a) for Experiment 3 because mice were sacrificed at Day 14.

|                                   | WT female<br>n=15 | WT male<br>n=15               | GW female<br>n=15 | GW male<br>n=16  |
|-----------------------------------|-------------------|-------------------------------|-------------------|------------------|
| <b>Mean peak disease severity</b> | <b>3.3</b>        | <b>2.3</b>                    | <b>3.3</b>        | <b>3.2</b>       |
| <i>Experiment 1</i>               | 3.6(0.25)<br>n=5  | 2.4(0.25) <sup>a</sup><br>n=5 | 3.5(0.33)<br>n=5  | 3.6(0.2)<br>n=5  |
| <i>Experiment 2</i>               | 2.8(0.5)<br>n=5   | 1.8(0.25) <sup>a</sup><br>n=5 | 2.6(0.25)<br>n=5  | 2.4(0.25)<br>n=5 |
| <i>Experiment 3</i>               | 3.5(0.33)<br>n=5  | 2.6(0.5) <sup>a</sup><br>n=5  | 3.8(0.25)<br>n=5  | 3.7(0.4)<br>n=6  |
| <b>Mean day of onset</b>          | <b>14.5</b>       | <b>17</b>                     | <b>13.4</b>       | <b>13.5</b>      |
| <i>Experiment 1</i>               | 12.8(0.6)         | 13.8(0.8)                     | 11.2(0.8)         | 12.2(0.4)        |
| <i>Experiment 2</i>               | 17.4(1.5)         | 20.8(1.9)                     | 16.2(1.7)         | 16.2(1.5)        |
| <i>Experiment 3</i>               | 13.3(0.8)         | 16.4(1.4) <sup>a</sup>        | 12.8(0.7)         | 12.1(1.1)        |
| <b>Cumulative score</b>           | <b>19.8</b>       | <b>8.9</b>                    | <b>20.6</b>       | <b>19.2</b>      |
| <i>Experiment 1</i>               | 23.2(3.2)         | 13.6(2.2) <sup>a</sup>        | 28.3(4.2)         | 27.8(3.3)        |
| <i>Experiment 2</i>               | 16.4(7.5)         | 4.2(2.2) <sup>a</sup>         | 12.8(4.0)         | 10.5(3.9)        |
| <i>Experiment 3</i>               | n/a               | n/a                           | n/a               | n/a              |
| <b>Death from disease</b>         | <b>0/15</b>       | <b>0/15</b>                   | <b>1/15</b>       | <b>1/15</b>      |
| <i>Experiment 1</i>               | 0/5               | 0/5                           | 0/5               | 0/5              |
| <i>Experiment 2</i>               | 0/5               | 0/5                           | 0/5               | 0/5              |
| <i>Experiment 3</i>               | 0/5               | 0/5                           | 1/5               | 1/5              |
| <b>Incidence</b>                  | <b>15/15</b>      | <b>15/15</b>                  | <b>15/15</b>      | <b>15/15</b>     |
| <i>Experiment 1</i>               | 5/5               | 5/5                           | 5/5               | 5/5              |
| <i>Experiment 2</i>               | 5/5               | 5/5                           | 5/5               | 5/5              |
| <i>Experiment 3</i>               | 5/5               | 5/5                           | 5/5               | 5/5              |

**Supplementary Table 3 : MOG-induced EAE in male and female mice.** Clinical EAE scores in male and female WT and Aire<sup>GW/+</sup> mice. Values in bold are cumulative means or sums for three experiments. For each experiment, values are means (SE). <sup>a</sup>Significant difference from genotype-matched female counterpart. \*Sum of scores from Day 0 to 21. Cumulative scores are not available (n/a) for Experiment 3 because mice were sacrificed at Day 14.



| <b>Region</b>                                        | <b>Primer sequences</b>    | <b>Orientation</b> | <b>Ref (PMID)</b> |
|------------------------------------------------------|----------------------------|--------------------|-------------------|
| Aire promoter (-2916 to -2643)                       | TGGAGAGAAGGTCAGCAGGT       | Forward            |                   |
|                                                      | CCTCGTTGCAGTTGAGACAA       | Reverse            |                   |
| Aire promoter (-1130 to -867)                        | CTTTTCCGGAGCAATCTCAG       | Forward            |                   |
|                                                      | GTGGACGAAGGTACCAGGAA       | Reverse            |                   |
| Aire promoter (-383 to -164)                         | GCCACATTCGGAAGTGAGAG       | Forward            |                   |
|                                                      | GACCACGCAAAGAGCAAAG        | Reverse            |                   |
| Positive control 1: PSA enhancer<br>(-4212 to -4127) | TGGGACAACCTTGCAAACCTG      | Forward            | 16137620          |
|                                                      | CCAGAGTAGGTCTGTTTTCAATCCA  | Reverse            |                   |
| Positive control 2: PSA promotor<br>(-273 to -184)   | CCTAGATGAAGTCTCCATGAGCTACA | Forward            | 16137620          |
|                                                      | GGGAGGGAGAGCTAGCACTTG      | Reverse            |                   |
| Negative control 1: -1575 to -1275                   | ACCTTCCTCCCCAGGTTTG        | Forward            |                   |
|                                                      | ATTAGGGCTGAAGGGTGGAC       | Reverse            |                   |
| Negative control 2: Aire exon 11                     | CTCGGGTTCGGGTTTCAGCTA      | Forward            |                   |
|                                                      | CCCGCCGACCACGCTCACT        | Reverse            |                   |

**Supplementary Table 4: Primer sequences for ChIP.**
